# Supplementary material
Source: PubMed Central journal article supplement (PMC5658253)
Supplement: NIHMS902018-supplement-Supplemental_material.pdf [file NIHMS902018-supplement-Supplemental_material.pdf]

## Calculation of plasma levels of bioavailable 25-hydroxyvitamin D

Definitions:

$[D_{total}]$  = measured total 25-hydroxyvitamin D levels in nmol/L  $\times 10^{-9}$  = total 25-hydroxyvitamin D levels in mol/L

$[Alb]$  = measured albumin levels in g/dL  $\div 6,643$ g/mol = albumin levels in mol/L

$[VDBP_{total}]$  = measured vitamin D binding protein levels in mg/L  $\times 10^{-3} \div 58,000$ g/mol = VDBP levels in mol/L

$[D_{Alb}]$  = albumin-bound 25-hydroxyvitamin D levels in mol/L

$[D_{VDBP}]$  = vitamin D binding protein-bound 25-hydroxyvitamin D levels in mol/L

$[D_{free}]$  = free (unbound) 25-hydroxyvitamin D levels in mol/L

$[D_{bioavailable}]$  = bioavailable 25-hydroxyvitamin D levels in mol/L =  $[D_{free}] + [D_{Alb}]$

$K_{Alb}$  = affinity constant between 25-hydroxyvitamin D and albumin =  $6 \times 10^5$ mol<sup>-1</sup>

$K_{VDBP}$  = affinity constant between 25-hydroxyvitamin D and vitamin D binding protein =  $7 \times 10^8$ mol<sup>-1</sup>

Equations:

$$[D_{VDBP}] = [D_{total}] - [D_{Alb}] - [D_{free}] \quad (1)$$

$$[D_{Alb}] = K_{Alb} \times [Alb] \times [D_{free}] \quad (2)$$

$$[D_{VDBP}] = K_{VDBP} \times [D_{free}] \times ([VDBP_{total}] - [D_{VDBP}]) \quad (3)$$

From equations (1) and (2)

$$[D_{VDBP}] = [D_{total}] - (K_{Alb} \times [Alb] + 1) \times [D_{free}] \quad (4)$$

From equations (3) and (4)

$$[D_{free}] = \{[D_{total}] - (K_{Alb} \times [Alb] + 1) \times [D_{free}]\} \div K_{VDBP} \div ([VDBP_{total}] - \{[D_{total}] - (K_{Alb} \times [Alb] + 1) \times [D_{free}]\}) \quad (5)$$

This can be simplified to fit a second-degree polynomial ( $ax^2 + bx + c = 0$ ) where  $x = [D_{free}]$ :

$$a = K_{VDBP} \times K_{Alb} \times [Alb] + K_{VDBP}$$

$$b = K_{VDBP} \times [VDBP_{total}] - K_{VDBP} \times [D_{total}] + K_{Alb} \times [Alb] + 1$$

$$c = -[D_{total}]$$

$$[D_{free}] = \frac{-b \pm \sqrt{b^2 - 4ac}}{2a}$$

$$[D_{bioavailable}] = [D_{free}] + [D_{Alb}] = (K_{Alb} \times [Alb] + 1) \times [D_{free}]$$
